# Supplementary material
Source: publisher site journal article supplement (https://www.dovepress.com/article/243411)
Supplement: Supplementary file 1 [file get_supplementary_file.php]

Table S1. Summary of questions used to assess patterns of SM usage.

| Aspect of SM | Response |
| --- | --- |
| 1- Which platform(s) do you use?  - Twitter  - Snapchat  - YouTube  - WhatsApp  - Instagram | 1-No 2-Yes  1-No 2-Yes  1-No 2-Yes  1-No 2-Yes  1-No 2-Yes |
| 2- What is the purpose of your SM usage?  - Education  - Entertainment  - Commercial  - Social | 1-No 2-Yes  1-No 2-Yes  1-No 2-Yes  1-No 2-Yes |
| 3- Which device(s) do you use?  - Smartphones  - Tablets  - Laptops  - Personal computers | 1-No 2-Yes  1-No 2-Yes  1-No 2-Yes  1-No 2-Yes |
| 4- How much time do you spend using SM?  - At bedtime?  - During the day? | < 1hr / 1-2 hr / > 2hrs  < 1hr / 1-2 hr / > 2hrs |
| 5- How frequently do you use SM?  - Per week?  - Per day? | Daily / not every day  > 4 times / ≤ 4 times |

Table S2. PHQ-21 screening tool for depression and GAD-22 for anxiety.

| PHQ-2  GAD-2 | | Over the last 2 weeks  How often have you been bothered by any of the following problems? | Not at all | Several days | More than half the days | Nearly every day |
| --- | --- | --- | --- | --- | --- | --- |
|  |  |
| 1. | Little interest or pleasure in doing things | | 0 | 1 | 2 | 3 |
|  |  | |  |  |  |  |
| 2. | Feeling down, depressed, or hopeless | | 0 | 1 | 2 | 3 |
|  |  | |  |  |  |  |
| 3. | Feeling nervous, anxious or on edge | | 0 | 1 | 2 | 3 |
|  |  | |  |  |  |  |
| 4. | Not being able to stop or control worrying | | 0 | 1 | 2 | 3 |
|  |  |  |  |  |  |  |

Questions 1 & 2 screen for depression, with a total score of 3 or more for these two items suggesting the strong possibility of clinical depression.

Questions 3 & 4 screen for anxiety (GAD, panic, PTSD & social anxiety), with a total score of 3 or more for these two items suggesting the strong possibility of clinical anxiety.

Sources

1. Kroenke K, Spitzer RL, Williams JB. The patient health questionnaire-2: validity of a two-item depression screener. Med Care. 2003;41(11):1284–1292. doi:10.1097/01. MLR.0000093487.78664.3C.
2. Plummer F, Manea L, Trepel D, McMillan D. Screening for anxiety 480 disorders with the GAD-7 and GAD-2: a systematic review and diagnostic metaanalysis. Gen Hosp Psychiatry. 2016;39:24–31. doi:10.1016/j.genhosppsych.2015.11.005

Acknowledgment

# The PHQ-2 (LOINIC Code: 55758-7) was based on the PHQ-9 and the GAD-2 (LOINIC Code: 69737-5) was based on the GAD-7, which were developed by Drs. Robert L. Spitzer, Janet B.W. Williams, Kurt Kroenke and colleagues, with an educational grant from Pfizer Inc. No permission required to reproduce, translate, display or distribute.
